1  
2  
3  
4  
5  
6  
7  
8  
9  
10  
11  
12  
13  
14  
15  
16  
17  
18  
19  
20  
21  
22  
23  
24  
25  
26  
27  
28  
29  
30  
31  
32  
33

## Convergent evolution of polyploid genomes from across the eukaryotic tree of life

Yue Hao<sup>1,\*</sup>, Jonathon Fleming<sup>2,\*</sup>, Joanna Petterson<sup>3</sup>, Eric Lyons<sup>4</sup>, Patrick P. Edger<sup>5,6</sup>, J. Chris Pires<sup>7,8,9</sup>, Jeffrey L. Thorne<sup>2,10-12</sup>, and Gavin C. Conant<sup>2,10,12,†</sup>

<sup>1</sup>Biodesign Center for Mechanisms of Evolution, Arizona State University, Tempe, AZ, U.S.A.  
<sup>2</sup>Bioinformatics Research Center and <sup>3</sup>Department of Biomedical Engineering, North Carolina State University, Raleigh, NC, U.S.A.; <sup>4</sup>School of Plant Sciences, University of Arizona, Tucson AZ, U.S.A.; <sup>5</sup>Department of Horticulture, Michigan State University, East Lansing, MI, U.S.A.; <sup>6</sup>Ecology, Evolutionary Biology and Behavior, Michigan State University, East Lansing, MI, U.S.A.; <sup>7</sup>Division of Biological Sciences, University of Missouri-Columbia, MO, U.S.A.; <sup>8</sup>Informatics Institute, University of Missouri-Columbia, MO, U.S.A.; <sup>9</sup>Bond Life Sciences Center, University of Missouri-Columbia, MO, U.S.A.; <sup>10</sup>Program in Genetics, <sup>11</sup>Department of Statistics and <sup>12</sup>Department of Biological Sciences, North Carolina State University, Raleigh, NC, U.S.A.

\*These authors contributed equally to this work  
†Correspondence: G. Conant, [gconant@ncsu.edu](mailto:gconant@ncsu.edu)

Running Head: Convergent patterns of evolution after polyploidy  
Keywords: polyploidy, convergent evolution, reciprocal gene loss, evolutionary model

34  
35  
36  
37  
38  
39  
40  
41  
42  
43  
44  
45  
46  
47  
48  
49  
50  
51  
52

**Abstract:**

By modeling the homoeologous gene losses that occurred in fifty genomes deriving from ten distinct polyploidy events, we show that the evolutionary forces acting on polyploids are remarkably similar, regardless of whether they occur in flowering plants, ciliates, fishes or yeasts. The models suggest these events were nearly all allopolyploidies, with two distinct progenitors contributing to the modern species. We show that many of the events show a relative rate of duplicate gene loss prior to the first post-polyploidy speciation that is significantly higher than in later phases of their evolution. The relatively low selective constraint seen for the single-copy genes these losses produced lead us to suggest that most of the purely selectively neutral duplicate gene losses occur in the immediate post-polyploid period. We also find ongoing and extensive reciprocal gene losses (RGL; alternative losses of duplicated ancestral genes) between these genomes. With the exception of a handful of closely related taxa, all of these polyploid organisms are separated from each other by tens to thousands of reciprocal gene losses. As a result, it is very unlikely that viable diploid hybrid species could form between these taxa, since matings between such hybrids would tend to produce offspring lacking essential genes. It is therefore possible that the relatively high frequency of recurrent polyploidies in some lineages may be due to the ability of new polyploidies to bypass RGL barriers.

## 53 **Introduction**

54           That organisms with doubled genomes existed was evident early in the history of genetics  
55 (Kuwada 1911; Clausen and Goodspeed 1925), and a lively debate was entered as to the  
56 implications of this fact. Wagner (1970) declared polyploidy to be “evolutionary noise” the same  
57 year that Susumu Ohno (1970) was giving it pride of place among the forces generating  
58 evolutionary innovations. The advent of genome sequencing changed the ground of this debate,  
59 opening new horizons of time for studies of the prevalence and influence of polyploidy. We  
60 know now that great branches of the eukaryotic evolutionary tree, including the vertebrates, all  
61 flowering plants and many yeasts, descend from ancient polyploids (Van de Peer, et al. 2017),  
62 events that were difficult or impossible to detect with older data. For reasons that are not yet  
63 fully understood, many of these groups also show recurrent polyploidies, especially flowering  
64 plants (Soltis, et al. 2009) and teleost fishes (Braasch and Postlethwait 2012).

65           With this extensive new set of polyploidies as a resource, other old questions can also be  
66 revisited, such as the relative prevalence of auto- and allopolyploids (Stebbins Jr 1947).  
67 Allopolyploidy refers to hybridizations between distinct species that result in doubled (or more)  
68 genomes, while autopolyploids are derived from a single progenitor species (Kuwada 1911;  
69 Clausen and Goodspeed 1925; Stebbins Jr 1947). Analyses of several paleopolyploid genomes  
70 have shown that while gene losses are common after polyploidy, in many cases the losses are not  
71 experienced equally by the two parental subgenomes (Thomas, et al. 2006; Emery, et al. 2018), a  
72 pattern known as biased fractionation. These biases are plausible but not definitive indicators of  
73 allopolyploidy.

74           There has also been controversy as to whether and how polyploidy affects the rate of  
75 speciation. Werth and Windham (1991) proposed that reciprocal gene losses (RGLs), the  
76 alternative loss of one of the two duplicated genes from different populations, could create  
77 Bateson–Dobzhansky–Muller incompatibilities between populations, because matings between  
78 them would give rise to offspring with no copies of the genes. Were those genes essential, the  
79 offspring lacking them would be inviable (Werth and Windham 1991) Such incompatibilities  
80 have been observed both in the wild and the laboratory (Mizuta, et al. 2010; Maclean and Greig  
81 2011). Muir and Hahn (2015) emphasize that RGL requires a period of reproductive isolation to  
82 form.

83           In the case of the yeast polyploidy, RGLs are commonly found between the descendant  
84 genomes, suggesting the potential for polyploidy to create new species by purely neutral means  
85 (Scannell, et al. 2006; Scannell, et al. 2007). However, direct analyses of the speciation and  
86 extinction rates of polyploid and nonpolyploid lineages has yielded inconclusive results, with  
87 some studies claiming reduced net diversification rates among polyploids and others disagreeing  
88 (Mayrose, et al. 2011; Soltis, Segovia-Salcedo, et al. 2014). More generally, the immediate and  
89 long-term adaptive value of polyploidy remains unclear: for instance, allopolyploids combine  
90 hybridizations with genome doubling and may derive immediate advantages from the  
91 hybridization effects rather than the doubling itself (Soltis, Visger, et al. 2014). Increased stress  
92 tolerance in polyploid organisms has also been invoked to argue for a radiation of polyploidy  
93 coincident with global catastrophes such as the KT mass extinction (Fawcett, et al. 2009).

94           Using our tool for modeling the evolution of polyploid genomes, POInT (the Polyploidy  
95 Orthology Inference Tool; Conant and Wolfe 2008), we explored the resolution of ten  
96 independent polyploidies. We adopt the term “homoeolog” below to refer to homologous genes  
97 produced by any type of polyploidy rather than “duplicate” or “ohnolog” because the events  
98 considered comprise several distinct types of polyploidy. The hallmark of polyploidy in a  
99 genome is a pattern of interleaved synteny, comprising not just the surviving homoeologs but  
100 also single-copy genes that are now found in interleaved positions on pairs (or more) of  
101 chromosomal segments homologous to the ancestral single-copy regions. In Figure 1A, we show  
102 an example of this evolutionary process, which yields conserved synteny blocks in the extant  
103 genomes. Those synteny blocks differ between genomes, meaning it is necessary to “phase”  
104 them into orthologous regions. As shown in Figure 1B, for a set of  $n$  tetraploid genomes, there  
105 are  $2^n$  possible orthology relationships at each ancestral locus. We use the term “pillar” to denote  
106 all of the genes or lost homoeologs at such a locus. POInT computes the likelihood of the  
107 observed homoeolog presence/absence data at each pillar for each possible orthology  
108 relationship. Via a hidden Markov model (HMM) that combines the possible orthology  
109 relationships for each pillar with the syntenic organization among pillars (Figure 1C), POInT  
110 employs posterior decoding to infer orthology estimates for each pillar with associated posterior  
111 probabilities (top of Figure 1D) as well as estimates of the model parameters describing the  
112 process of homoeolog loss (Figure 2B and C).

113 Our analyses here encompass a total of 50 polyploid genomes and more than 460,000  
 114 individual genes (Figure 2A). We find that the patterns of gene loss after these different events  
 115 show strikingly similar patterns, with strong evidence for biased fractionation and homoeolog  
 116 fixation. Using synonymous substitutions as an evolutionary clock, we show that the rate of gene  
 117 loss immediately after a polyploidy is generally higher than in later periods. RGL is also  
 118 prevalent after all of these polyploidies, and we suggest it might introduce barriers to  
 119 hybridization that could be overcome through subsequent allopolyploidy events.  
 120

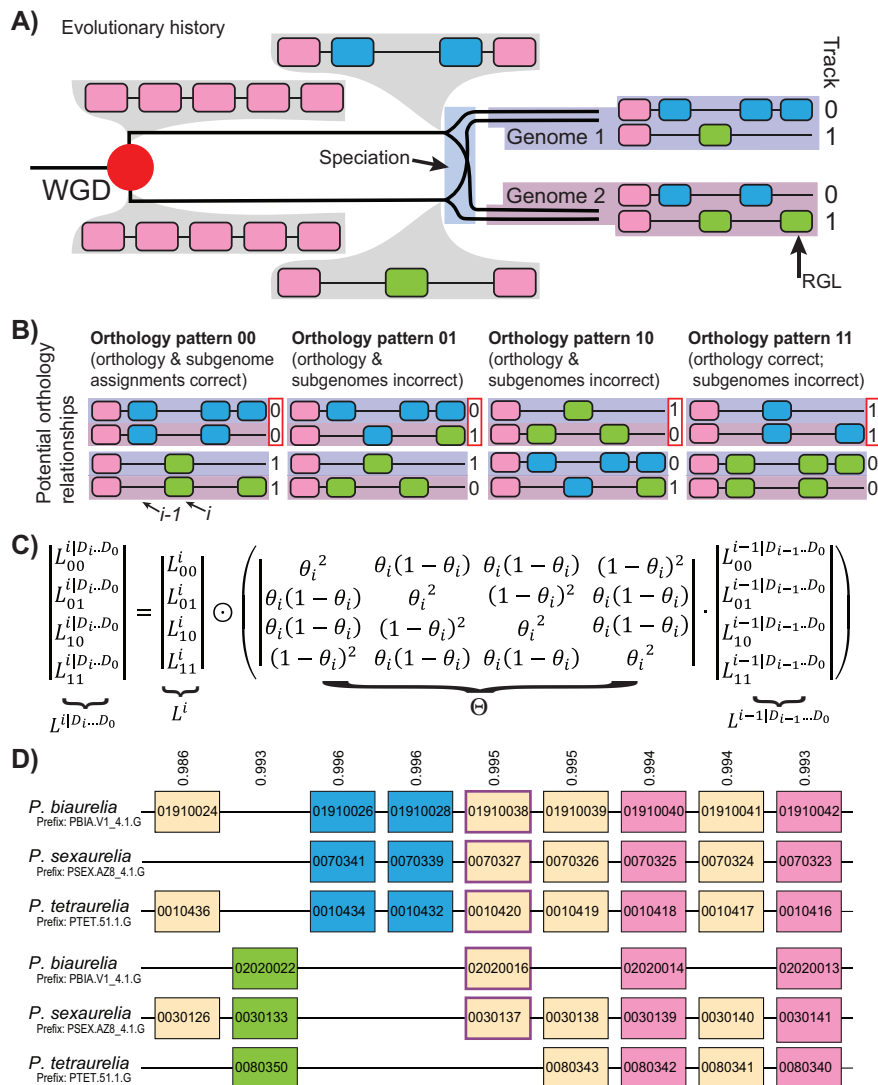

121 **Figure 1: Inferring orthologous chromosome regions between polyploid genomes with POInT (the**  
 122 **Polyploidy Orthology Inference Tool). A) Cartoon model of gene losses and a speciation event**  
 123 **after a whole-genome duplication. Immediately after the WGD, all five genes are present in two**  
 124 **homoeologous copies. Three homoeologous gene losses occur prior to the split of the two**  
 125 **species, one in the less fractionated subgenome (Track “0;” yielding the green gene in the lower**  
 126 **window) and two from the more fractionated subgenome (Track “1;” yielding the two blue genes**  
 127 **in the upper window). After the speciation event, Genome 1 loses a homoeolog from the more**  
 128

129 fractionated subgenome and Genome 2 loses one from the less fractionated subgenome, a case  
130 of reciprocal gene loss (RGL). **B**) There are  $2^n=4$  potential ways of phasing the two chromosomal  
131 regions from Genome 1 relative to Genome 2 (e.g., of assigning orthology between the two  
132 regions). We identify these 4 states with the subgenome assignment for the top track for each of  
133 the two genomes (00→11; red boxes at the right of each diagram). POInT uses a model of  
134 homoeolog loss to compute the likelihood of the observed gene presence/absence data at each  
135 locus (or “pillar”) for each of these  $2^n$  relationships. These relationships each constitute a hidden  
136 state of the HMM implemented by POInT whereas a likelihood of observed gene  
137 presence/absence data for a relationship represents an emission probability for the HMM. **C**)  
138 Recurrence equation for computing the likelihood of each orthology assignment at pillar  $i$   
139 conditional on the data at pillars 0 through  $i-1$  (see **B**). For pillar  $i$ , we define a vector  $L^i$  to be the  
140 likelihood of the orthology states, with elements  $L_{00}^i$ ,  $L_{01}^i$ ,  $L_{10}^i$  and  $L_{11}^i$  being POInT’s estimates of  
141 the likelihood of each such state based on the gene presence/absence data at that pillar. We then  
142 use a transition probability matrix  $\Theta$ , with each entry representing the probability that pillar  $i$  has a  
143 particular orthology state conditional upon another orthology state at  $i-1$ . The probability that the  
144 orthology state is maintained between pillars  $i-1$  and  $i$  is  $1-\theta_i$  for each genome (and  $(1-\theta_i)^2$  in total);  
145 the chance that one genome changes orthology state is  $\theta_i(1-\theta_i)$  and the chance that both change  
146 is  $\theta_i^2$ . Here,  $\theta_i=\theta$ , a global constant estimated from the data by maximum likelihood, except when  
147 synteny is not maintained between pillars, in which case  $\theta_i=0.5$  (adjacent pillars do not inform on  
148 each other’s orthology state; *Methods*). To compute a likelihood for the entire data set, POInT  
149 implements an HMM forward algorithm that expresses  $L^{i|D_i\dots D_0}$ , the probabilities of orthology  
150 relationships for pillar  $i$  and the observed data at pillars 0 through  $i$  (denoted  $D_i \dots D_0$ ), in terms of  
151 the emission probabilities  $L^i$ , the transition probabilities  $\Theta$  and the probabilities  $L^{i-1|D_{i-1}\dots D_0}$  that  
152 were already computed for pillar  $i-1$ . The vector of  $L^{i|D_i\dots D_0}$  is then the element-wise vector product  
153 (indicated with the “ $\odot$ ”) of  $\Theta \cdot L^{i-1|D_{i-1}\dots D_0}$  and  $L^i$ . This formula can be applied sequentially starting  
154 at pillar 0, with the base case  $L^{0|D_0} = L^0$ . For  $m$  pillars, the overall likelihood of the dataset is then  
155 the sum of the elements of  $L^{m|D_m\dots D_0}$ . **D**) Given an inferred ancestral gene order prior to the  
156 polyploidy (*Methods*), POInT employs posterior decoding to infer the orthology relationships at  
157 each pillar. Here we illustrate a small region of such an ancestral order from the more recent  
158 *Paramecium* WGD (after phasing from the earlier duplication, see *Methods*), showing the set of  
159 orthology relationships inferred by posterior decoding. For reference, genes in adjacent pillars  
160 that are also neighbors in an extant genome are shown connected by lines. The number above  
161 each pillar is the posterior probability of the inferred orthology relationship. The upper set of three  
162 tracks correspond to the less-fractionated parental subgenome, the lower three to the more  
163 fractionated one, illustrating the possibility for local variation in biased fractionation. Gene  
164 retained from *only* the less-fractionated genome are colored blue, from *only* the more fractionated  
165 one green, and fully retained duplicates are shown in pink. All other patterns of duplicate retention  
166 are shown in beige for clarity. See also Figure 2B.

167

168

## 169 **Results**

### 170 *Modeling evolution after ten independent polyploidies.*

171 Using POInT, we assembled a set of ~70,000 homoeologous loci produced by ten  
172 different polyploidies. For each polyploidy, we inferred a set of pillars that it created and ordered  
173 them so as to maximize the retained synteny among the extant genes, approximating the  
174 ancestral order of the single-copy genes just prior to polyploidy (*Methods*). Six of the events are  
175 whole genome duplications (WGDs or tetraploidies): At- $\alpha$  in *Arabidopsis thaliana* and its

176 relatives, a WGD found in legumes, the  $\rho$  event from grasses, the teleost-specific genome  
177 duplication (TGD), and WGDs from salmonids and yeasts. We further analyzed an asexual  
178 triploidy in nematodes, a hexaploidy (whole genome triplication; WGT) in cabbages and their  
179 relatives (*Brassica* WGT) and two octoploidies: the vertebrate 2R polyploidy and another in the  
180 paramecia (Figure 2A). Analyzing octoploidies in POInT is computationally expensive. As a  
181 result, we modeled the octoploidy among the paramecia as occurring via two sequential genome  
182 duplications and then extracted and analyzed only the more recent of these two events for the  
183 remainder of our work (*Methods*). This approach failed with the vertebrate 2R event, presumably  
184 because the two events are very ancient and closely spaced in time. A visual interface to these  
185 data is available from the POInT browser ( <http://wgd.statgen.ncsu.edu>).

186 For the WGD events, we compared nested models of evolution (Figure 2B and  
187 Supplemental Table 1) that describe the process of homoeolog loss after polyploidy: these  
188 models differ as to whether they include biased fractionation, duplicate fixation and convergent  
189 homoeolog losses. For all seven tetraploidies, models that allow for the fixation of homoeologs  
190 after polyploidy fit the observed loss data better than models without such an effect ( $\gamma \neq 0$ ;  $P < 10^{-10}$ ;  
191 likelihood ratio test or LRT; Figure 2). In addition, every event save that in yeast shows  
192 strong evidence for biased fractionation ( $\epsilon \neq 1$ ;  $P < 10^{-7}$ ; LRT; Figure 2), while all but the  
193 *Paramecium* event show a pattern of independent yet convergent losses to the same homoeolog  
194 in independent lineages ( $\delta \neq 0$ ;  $P < 10^{-10}$ ; LRT; Figure 2). The nematode triploidy and the *Brassica*  
195 WGT also share similar patterns of biased fractionation (Figure 2 and Supplemental Table 2).

196 The fact that these events are of widely differing ages is evident from the different  
197 degrees of loss/resolution seen in the extant genomes. The branches of Figure 2A are color-  
198 coded by POInT's inferences of the proportion of single-copy genes (e.g., loci where all but one  
199 of the homoeologous genes have been lost) present at their beginning and ending. While the  
200 yeast WGD is inferred to be nearly "fully" resolved (nearly all homeologous loci reduced to  
201 single-copy), the tetraploidy in salmonid fishes and the nematode triploidy show proportionally  
202 few single-copy genes. The nematode triploidy differs from the remaining events in that these  
203 animals are asexual triploids and are likely under a different selective regime in their gene losses,  
204 (Schoonmaker, et al. 2020). The continued occurrence of meiotic chromosome pairings of  
205 homoeologous chromosomes created by the salmonid event may have reduced the rate of  
206 homoeolog loss in those genomes (Allendorf, et al. 2015).

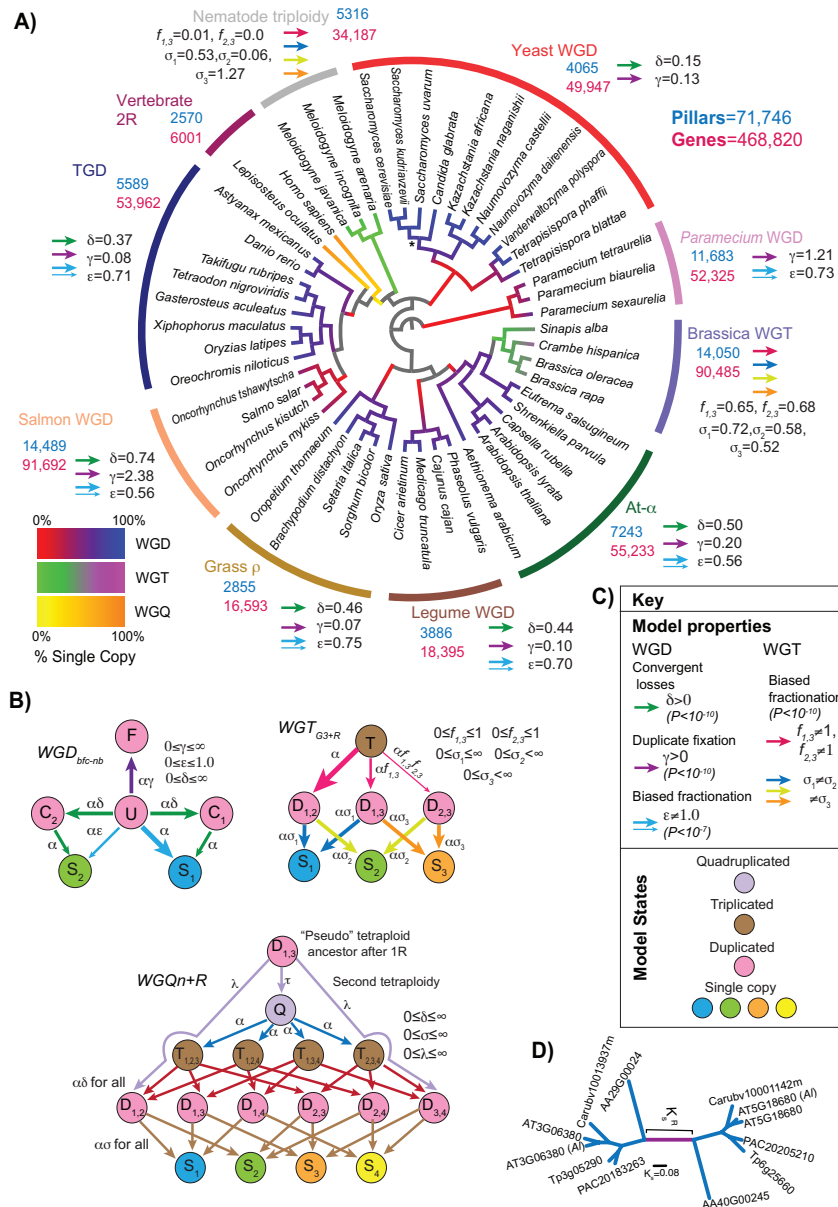

207  
208  
209  
210  
211  
212  
213  
214  
215  
216  
217  
218  
219  
220  
221  
222  
223

**Figure 2:** Modeling the resolution of ten polyploidy events with POInT. **A)** The assumed phylogenetic relationships of the ten polyploidies studied. Grey branches indicate where no polyploidy event was studied. The relationships of the taxa were inferred from the homoeolog loss data for the legume WGD, grass  $\rho$ , nematode triploidy, salmonid WGD and the Paramecium WGD. For the yeast WGD, At- $\alpha$ , the TGD and the Brassica WGT, the relationships were taken from published sources (the vertebrate 2R tree is trivial). Because the temporal divergences of various groups are not well established, the tree is illustrated in an ultrametric format with nonmeaningful branch lengths (Scaled topologies for each event are shown in Supplemental Figure 4). However, each polyploid branch is colored using POInT's estimates of the proportion of loci that were single-copy at its beginning and ending. Corresponding color keys for tetra, hexa and octoploidies are shown. The number of "pillars" (homoeologous loci) and the total number of gene models studied across each event are noted, as are the total number of loci and genes considered. The "\*" on the yeast WGD branch indicates the branch where the proportion of genes returned to single-copy that are presently essential was tested (Supplemental Table 5). Next to each event, we show arrows and parameter estimates indicating post-polyploidy evolutionary processes such as biased



224 fractionation for which we found significant evidence in that event (see key in panel **C**). **B**  
225 Nested models of post-polyploidy evolution for the three types of events (WGD: whole-genome  
226 duplication/tetraploidy, WGT: whole-genome triplication/hexaploidy and WGQ: whole-genome  
227 quadruplication/octoploidy). Using POInT, we fit nested models of gene loss after polyploidy  
228 with likelihood ratio tests (*Methods*). **WGD**: all pillars start in state **U** (**U**ndifferentiated), from  
229 which they can transition to either the three other duplicated states, **C**<sub>1</sub> (**C**onverging state 1), **C**<sub>2</sub>  
230 (**C**onverging state 2) and **F** (**F**ixed) or to the two single-copy states **S**<sub>1</sub> (**S**ingle-copy 1) and **S**<sub>2</sub>  
231 (**S**ingle-copy 2). **C**<sub>1</sub> and **S**<sub>1</sub> are states where the gene from the less-fractionated parental  
232 subgenome will be or are preserved, and **C**<sub>2</sub> and **S**<sub>2</sub> the corresponding states for the more-  
233 fractionated parental subgenome. The null model has parameters  $\gamma=\delta=0$  and  $\varepsilon=1.0$ . Duplicate  
234 fixation is inferred when  $\gamma\neq 0$ , convergent losses when  $\delta\neq 0$  and biased fractionation when  
235  $\varepsilon<1.0$ . **WGT**: in the base model all pillars start in state **T** (**T**riplicated) and transition first to  
236 duplicated states (**D**<sub>x,y</sub>) and hence to the single-copy states (**S**<sub>x</sub>). Genome 1 is assumed to be  
237 favored (fewer losses) and the identity of that genome inferred in the POInT computation.  
238 Losses from the triplicated state are then increasingly disfavored first to **D**<sub>1,3</sub> (parameter  $f_{1,3}$ )  
239 and **D**<sub>2,3</sub> (parameter  $f_{2,3}$ ). There are also individual rates of loss from the duplicated to single-  
240 copy states ( $\delta_x$ ). In the null model,  $f_{1,3}=f_{2,3}=1.0$  and  $\delta_1=\delta_2=\delta_3$ . We also fit a separate model that  
241 allow this set of parameters to take on separate values on the root branch and on the remaining  
242 branches (Supplemental Table 1). **WGQ**: Models of octoploid formation. The null model simply  
243 treats the four subgenomes as equivalent and as starting in the quadruplicated state (**Q**). This  
244 model has different loss rates from triplicated to duplicated loci (**T**<sub>x,y,z</sub> to **D**<sub>x,y</sub>, parameter  $\delta$ ) and  
245 duplicated to single-copy loci (**D**<sub>x,y</sub> to **S**<sub>x</sub>, parameter  $\sigma$ ). A formation model for the octoploidy can  
246 then be added: all pillars start in state **D**<sub>1,3</sub> and can symmetrically experience a gene loss from  
247 genome 1 or 3 (parameter  $\lambda$ ) and transition to state **D**<sub>1,2</sub> or **D**<sub>3,4</sub> or become quadruplicated (null  
248 transition). The three models illustrated here are the most complex model fit to the various  
249 events, including the parameters associated and their numerical range. **C**) Description of the  
250 various modeled features from panels **A** and **B** (top) and the model states from **B** (bottom). **D**)  
251 An example mirrored gene tree for a completely retained set of homoeologs from At- $\alpha$ ,  
252 illustrating the trees from which synonymous divergences were estimated. The branch lengths  
253 are given in number of synonymous substitution per synonymous site (e.g.,  $K_s$ ), with the shared  
254 internal (e.g., “root”) branch shown in purple ( $K_s^R$ ). For analysis purposes, the length of this  
255 branch was always divided by two to be comparable to the remaining branches (e.g., split at its  
256 midpoint).

257  
258

259 *Many events show rapid homoeolog loss immediately after polyploidy.*

260 Loss of duplicate genes immediately after polyploidy can be rapid (Scannell, et al. 2006;  
261 Scannell, et al. 2007), and at least two non-exclusive hypotheses exist as to why. The first is that  
262 genetic drift should eliminate truly redundant gene copies quickly (Li 1980; Lynch and Conery  
263 2000). The second is the potential for “selected” duplicate losses. These losses might occur if the  
264 increases in gene copy number after polyploidy induce disadvantageous dosage conflicts, such  
265 that natural selection acts to remove the homoeologous copies in question (Edger and Pires 2009;  
266 De Smet, et al. 2013).

267 To study the pattern of early losses, we examined the divergence that occurred  
268 immediately after the polyploidy and prior to any speciation events. In the context of a gene tree  
269 for a pair of homoeologous genes produced by a WGD, this period corresponds to the internal

270 branch of the gene tree separating that pair of homoeologs. For a WGT, the situation is  
271 analogous except that there are three such branches separating the three homoeologous copies.  
272 For simplicity, we refer to these branch(es) as the “root” (purple in Figure 2D). For all branches  
273 in each polyploidy, we obtained a rough estimate of the time encompassed by that branch by  
274 using the mean number of synonymous substitutions per synonymous site ( $\overline{K}_s$ ) across many  
275 homoeologous genes as a neutral clock (*Methods*). The rate of homoeolog loss for each branch is  
276 given by POInT’s branch length estimate ( $\alpha$ ), computed with an irreversible exponential loss  
277 model proportional to the number of homoeologous copies at the beginning of that branch  
278 (meaning that they are not biased by the fact that later branches have fewer total homoeologs  
279 available for loss, *Methods*). The ratio of  $\alpha \cdot t / \overline{K}_s$  gives a sense of whether homoeolog losses per  
280 time are unusually high or low for a given branch relative to other branches in the same  
281 polyploidy. For the majority of the polyploidies, we found that the  $\alpha \cdot t / \overline{K}_s$  ratio was higher for  
282 the root branch than any other branch, consistent with a more rapid loss of homoeologs along  
283 this branch (Figure 3). This result is the more striking because the inferred mean  $K_s$  value for the  
284 root branch ( $\overline{K}_s^R$ ) should, in the case of an allopolyploidy, also include the pre-polyploidy  
285 progenitor divergences. Hence, the  $\overline{K}_s^R$  values for these events should be over-estimates, making  
286 the  $\alpha \cdot t / \overline{K}_s^R$  ratio an underestimate of the relative homoeolog loss rate along the root branch.

287 If natural selection were actively favoring the loss of some homoeologous copies  
288 immediately after polyploidy, we might expect that the genes involved in those early losses  
289 would display a stronger selective constraint than do homoeologous copies lost later in the  
290 polyploidy’s history. We hence compared the average selective constraint, measured as the ratio  
291 of nonsynonymous to synonymous substitutions, or  $K_a/K_s$ , of fully single-copy genes whose  
292 homoeologs were lost along the root branch to that of other fully single-copy genes where the  
293 preservation of homoeologous copies from alternative subgenomes means that the losses must  
294 have occurred after the first speciation event. For most events we observe little difference  
295 between these two groups, while for the Legume WGD the single-copy genes lost later are  
296 actually *more* constrained, the opposite of the prediction for selected losses (Supplemental  
297 Figure 1).

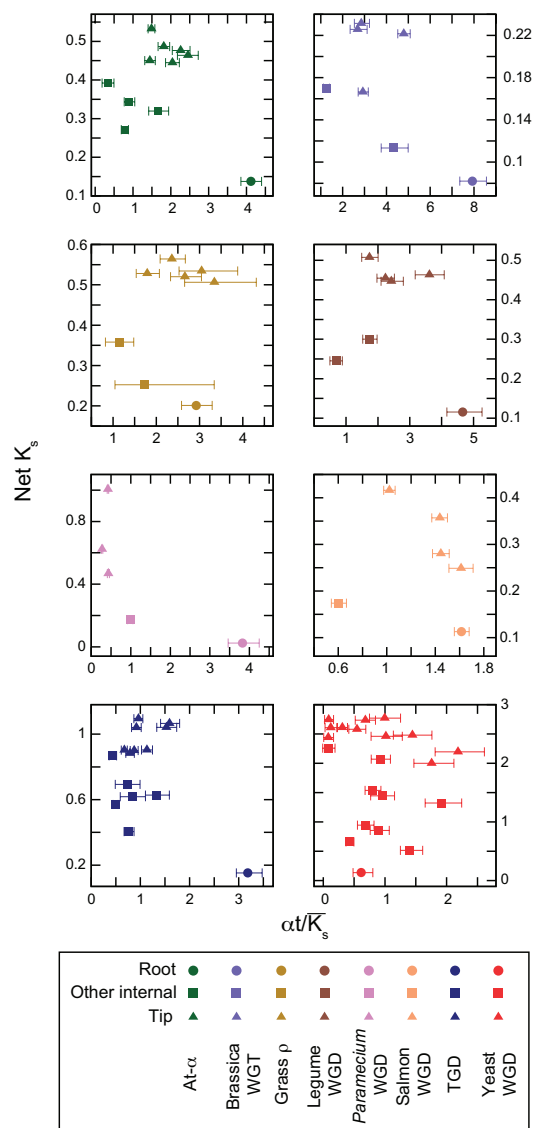

298  
 299  
 300  
 301  
 302  
 303  
 304  
 305  
 306  
 307  
 308  
 309  
 310  
 311  
 312  
 313  
 314

**Figure 3:** Rapid loss of homoeologs immediately after polyploidy. On the x-axis is the ratio of rate of homoeolog loss (the  $\alpha t$  branch length estimate from POInT's models, see Figure 2) and the estimated mean synonymous divergence for that branch ( $\overline{K}_s$ ; see *Methods*). Hence, larger values of this ratio indicate more homoeolog losses per unit  $K_s$ . For the At- $\alpha$ , Brassica WGT, Legume WGD, Paramecium WGD and the TGD, the  $\alpha \cdot t / \overline{K}_s$  ratio for the root branch is significantly larger than seen on any other branch (c.f., the 95% confidence intervals shown, computed as described in the *Methods* section). For these panels, we used a model excluding duplicate fixation here because including fixation in the model occasionally results in very long estimates of tip branch lengths (*Methods*). However, our conclusions are similar under the fully WGD<sub>bfc-nb</sub> model (see Supplemental Figure 7). On the y-axis is the net synonymous divergence to the end of the branch in question: in other words, the sum of the synonymous divergence of that branch and all its ancestors back to the root branch. This net divergence value is a rough indicator of the time since the polyploidy for each branch. The root branch is indicated with a circle, other internal branches with squares and tip branches with triangles.

315 *Extensive reciprocal gene loss between pairs of polyploid taxa.*

316       Following Scannell and colleagues (2006; 2007), we searched for post-polyploidy  
317 reciprocal gene losses (RGL). We omitted the vertebrate 2R and nematode triploidy from this  
318 analysis due to the fragmented nature of the genomes used. With the exception of three closely  
319 related yeast species in the *Saccharomyces* genus, every pair of genomes in our remaining eight  
320 polyploidies were separated by at least 4 RGLs (this minimal number was seen in the platyfish,  
321 tilapia and medaka clade of the TGD; Figure 4C), with the number rising to over a thousand for a  
322 few of the yeast taxa pairs. These conclusions are also robust to the confidence cutoffs used to  
323 infer the RGLs (Supplemental Figure 2). Our results are in accord with previous work in yeasts  
324 and grasses (Scannell, et al. 2006; Scannell, et al. 2007; Schnable, et al. 2012), and there appears  
325 to be a relatively direct relationship between the synonymous divergence of a pair of taxa (a  
326 proxy for divergence time) and the number of RGLs separating them (Figure 4A and B). Such a  
327 relationship would be expected if both RGLs and synonymous substitutions were accumulating  
328 through neutral evolutionary processes (Figure 4A). However, the proportionality between  
329 synonymous substitutions and RGLs differs between polyploidy events, with the yeast WGD  
330 showing more RGLs per unit  $K_s$  than the other events. When we compared the genes involved in  
331 reciprocal losses in zebrafish, *A. thaliana* and bakers' yeast to other single-copy genes, there  
332 were no significant functional differences between these two sets, again as one would expect  
333 were RGL a neutral process (*Methods*).

334       The evolutionary importance of RGLs can be assessed by the biological role of the genes  
335 that experienced it. For instance, were only “non-essential” genes to experience RGL, then it  
336 might not present significant barriers to hybridization. We can use experimental data on gene  
337 essentiality from bakers' yeast, *A. thaliana* and zebrafish (*Methods*) to ask whether the  
338 proportion of RGLs that include an essential gene differs from the overall proportion of essential  
339 single-copy genes. For the At- $\alpha$  and TGD events, the proportion of RGLs where the surviving  
340 gene in *A. thaliana* or zebrafish is essential does not differ from the proportion of other single-  
341 copy genes that are essential (Supplemental Table 3). Curiously, the RGLs found when  
342 comparing bakers' yeast to some of its nearer relatives are actually *more* likely to be essential  
343 than other single-copy genes (Supplemental Table 3). This overrepresentation is likely  
344 attributable to the shared duplicate losses that occurred prior to the first speciation event being  
345 underrepresented in essential genes (Supplemental Table 4). As a result, RGLs, which must have

346 occurred *after* the first speciation event (see the yeast clade of Figure 2A), would be enriched in  
 347 essential genes simply because more essential genes survived in duplicate past that first  
 348 speciation.

349  
 350  
 351

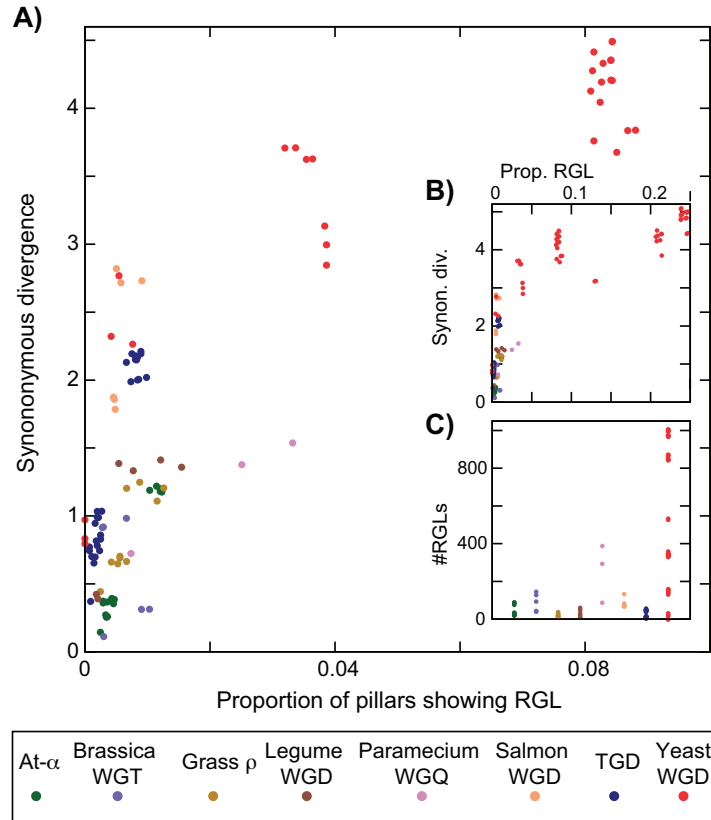

352  
 353  
 354  
 355  
 356  
 357  
 358  
 359  
 360  
 361  
 362  
 363  
 364  
 365  
 366  
 367  
 368  
 369  
 370

**Figure 4:** Reciprocal gene loss (RGL) after polyploidy. **A)** Reciprocal gene losses (RGLs) between pairs of polyploid taxa (x-axis, normalized by the total number of loci/pillars analyzed for that event) as a function of the inferred synonymous divergence of those taxa (y-axis). Panel **A** gives a cropped view that focuses on RGLs in the non-yeast taxa, while panel **B** shows how the RGL frequencies in yeast dramatically exceed those for the remaining events. For each pair of taxa from a given event, we identified all single-copy loci in the two genomes where POInT infers a 95% or greater confidence that those genes are paralogs created by the ancient polyploidy and not more recent orthologs produced by the post-polyploidy speciation events. There are roughly linear relationships between RGL frequency and synonymous divergence. Because the data points shown are phylogenetically dependent (different species pairs share considerable common evolutionary history), we have not attempted to fit regression lines to these data. Standard approaches to phylogenetically independent contrasts (Felsenstein 1985) do not apply here as the inferred RGLs are pairwise species traits and not independent measures on each taxon. It is however notable that the asexually reproducing yeasts appear to accumulate more RGLs per unit  $K_s$  than other taxa. **B)** As for **A** but including the full range of RGL prevalence in the taxa sharing the yeast WGD. **C)** Total numbers of RGLs inferred for each pair of taxa for each event.

371 The importance of RGL in driving speciation events among polyploid taxa has been  
372 questioned on theoretical grounds, as the appearance of RGLs is subject to the same requirement  
373 of reproductive isolation as are the appearances of other genetic incompatibilities among  
374 populations (Muir and Hahn 2015). This objection has more force for obligately sexual  
375 organisms than it does for organisms such as bakers' yeast, where it is estimated that there are  
376 1000 mitotic cell divisions for every meiosis and that only about 1% of meioses are out-crosses  
377 (Tsai, et al. 2008). Indeed, Figure 4 suggests that RGL may occur more frequently in yeasts (and  
378 potentially in some plants, which may also reproduce asexually) than in the teleost fishes and  
379 particularly the salmonids.

380 Even if RGL does not drive speciation, it still represents a barrier to diploid hybrids: most  
381 of the taxa pairs for which essentiality data are available are separated from each other by at least  
382 one RGL for an essential gene, the exceptions being some of the closest relatives of *A. thaliana*,  
383 zebrafish and bakers' yeast studied (Supplemental Table 3). This observation is consistent with  
384 studies of the relative frequency of diploid and polyploid hybridizations in flowering plants. In  
385 these lineages, it is rare to find successful diploid hybrids involving distantly related parental  
386 species (where RGLs could be common). However, allopolyploid hybrids appear to form at  
387 similar rates across a much larger range of divergence times (Buggs, et al. 2009). A potential  
388 explanation for the frequency of recurrent polyploidy is therefore simply that a new  
389 allopolyploidy can allow paleopolyploids to again enjoy the benefits of hybridization (such as  
390 hybrid vigor and heterosis; Birchler, et al. 2006; Chen 2010) in the face of their isolation due to  
391 RGL.

392

### 393 **Discussion**

394 There are a surprising number of similarities seen in the manner of polyploidy resolution  
395 across these independent polyploidies. Biased fractionation and other patterns in the homoeolog  
396 losses are similar across many events: reciprocal gene losses are also present for most pairs of  
397 polyploid taxa. The rate of homoeolog loss immediately after polyploidy is very high for many,  
398 but not all, events (Figure 3).

399 Moreover, the differences in evolutionary patterns we do see are often in keeping with  
400 what we know about the history of the events themselves. For instance, the salmonid WGD is  
401 marked by continuing pairing of homoeologous chromosomes in meiosis (Allendorf, et al. 2015).

402 These pairings appear to limit the number of homoeolog losses and, for this event, loss rates at  
403 the phylogeny tips and root are similar (per unit  $K_s$ ). The grass  $\rho$  and yeast events have loss rates  
404 that are roughly similar (again per unit  $K_s$ ) across time, a fact for which we currently do not have  
405 an operating hypothesis.

406 For the events that do show rapid losses along the root branch, which of the two  
407 hypotheses mentioned, drift or selected losses, seems to best explain our data? The homoeologs  
408 lost along the root are not more selectively constrained than other purely single-copy genes  
409 known to have been lost later (Supplemental Figure 1). This fact probably speaks against any  
410 very large number of selected losses. The single-copy genes as a whole are also generally  
411 somewhat less selectively constrained than are genes with surviving homoeologs (Supplemental  
412 Figure 1). Moreover, there is a clear pattern in most events whereby most of the fully single-copy  
413 genes that exist are predicted to have been lost on the root branch (Supplemental Figure 3). The  
414 yeast, nematode, and Paramecium events may violate this pattern because the nematode event is  
415 an asexual triploidy while the other two involve lineages that have significant rates of asexual  
416 reproduction. In such cases, restoring proper meiotic pairing is less necessary than in taxa with  
417 primarily sexual reproduction. As a result, we expect that asexually reproducing lineages could  
418 more easily form viable new species immediately after polyploidy, meaning that the post-  
419 polyploid “lag” in speciation might be less evident (Schranz, et al. 2012). As a preliminary  
420 hypothesis, we therefore propose that, for most polyploidies in animals and plants, the majority  
421 of the purely neutral homoeolog losses occur prior to extensive species divergence in the  
422 polyploid clade. A natural extension to this proposal would be that the post-polyploidy lag  
423 represents this earlier period of neutral homoeolog loss, though the question of why speciation  
424 events might be rare during such a period is still to be answered. A further implication would be  
425 that later losses (including RGLs) would have occurred in homoeologous pairs that were initially  
426 preserved to maintain dosage balance. They are then only lost when later mutations, such as  
427 expression changes, release this dosage constraint and allow the loss of one of the copies  
428 (Birchler, et al. 2005; Conant, et al. 2014). The higher selective constraint of genes with  
429 surviving homoeologs is arguably also consistent with this hypothesis.

430 While the best-studied ancient polyploidy is in bakers’ yeast, it is hence atypical in a  
431 number of respects. Biased fractionation is much less evident here (Emery, et al. 2018), losses  
432 are not heavily biased toward the earliest phases of the polyploidy (Figure 3) and RGL is much

433 more prevalent. As mentioned above, one major source of these differences is likely the relative  
434 timing of the post-polyploidy speciations: the yeasts had almost no lag between their polyploidy  
435 and the first speciation (Supplemental Figure 4; Schranz, et al. 2012).

436 Other questions remain unanswered. The relative formation rates of allo- and  
437 autopolyploids are uncertain. While recent polyploids appear to be approximately equally  
438 divided between the two (Barker, et al. 2016), the potential selective advantages of being an  
439 allopolyploid, and hence a hybrid (Alix, et al. 2017; Blanc-Mathieu, et al. 2017), could result in a  
440 strong skew towards allopolyploids among the rare polyploidies that survive to become the  
441 ancient events of the kind studied here (Barker, et al. 2016). The results here are consistent with  
442 this hypothesis, but our sample of events is potentially biased by the available genome  
443 sequences. Across all of the events, we find that the ubiquity of homoeolog fixation and (except  
444 in paramecia) convergent homoeolog losses both speak to a common selective environment  
445 acting to maintain certain homoeologs after all of these events. The most obvious candidate for  
446 such a selective force is again the dosage balance hypothesis: it argues that highly interacting  
447 genes tend to remain in multiple copies post-polyploidy to preserve the stoichiometry of those  
448 interactions (Birchler, et al. 2005; Birchler and Veitia 2012; Tasdighian, et al. 2017). Whatever  
449 the role of RGL in speciation, it is clear that all of these polyploid organisms possess a degree of  
450 isolation due to it. The role of RGL in recurrent polyploidy is hence an important topic for future  
451 research. Biology has a history of viewing “rules” as being more honored in the breach, but the  
452 commonalities in post-polyploidy genome evolution across wide taxonomic distances are both  
453 interesting in their own right and for the insight they give on other aspects of biology (Pires and  
454 Conant 2016).

455

## 456 **Methods**

457 *Synteny block inference.*

458 Our three-step pipeline for inferring blocks of  $n$ -fold conserved synteny (NCS) produced  
459 by polyploidy (Conant 2020) first uses GenomeHistory (Conant and Wagner 2002) to find all  
460 pairs of homologous genes between each polyploid genome and a nonpolyploid outgroup (see  
461 Supplemental Table 5 for genome details and Supplemental Table 6 for parameters). The second  
462 step seeks to place these homologous genes into  $N:1$  relationships between the polyploid genome  
463 and the outgroup ( $N=2$  for a WGD,  $N=3$  for a hexaploidy and  $N=4$  for an octoploidy). Using



464 simulated annealing (Kirkpatrick, et al. 1983), this step proposes sets of ordered pillars, each of  
465 which contains a single gene from the nonpolyploid outgroup ( $G$ ) and no more than  $N$  of the  
466 homologs of that gene from the polyploid genome. The annealing algorithm then seeks a  
467 combination of these assignments and a relative ordering of the  $m$  outgroup genes  $G_1..G_m$  that  
468 maximizes the number of synteny relations. We define two genes to be in synteny if they are  
469 neighbors in the genome, ignoring any genes without homologs to the compared genome. In the  
470 third step, these NCS blocks for each polyploid genome are merged across all of the polyploid  
471 genomes. In this merging, only pillars where we have at least one homologous and syntenic gene  
472 from each polyploid genome are included. With the set of merged pillars, a further simulated  
473 annealing search is undertaken to infer a global pillar order that minimizes the number of  
474 synteny breaks. While not strictly an ancestral genome inference (Sankoff and Blanchette 1998),  
475 it is helpful to think of this optimal ordering as approximating the order of the genes just prior to  
476 the polyploidy. Our previous work has shown that this inference approach is highly specific, with  
477 no apparent cases of paralogous genes not created by the polyploidies in question being included  
478 in the pillars (Emery, et al. 2018; Conant 2020).

479

#### 480 *Modeling polyploidies with POInT*

481 At each pillar, POInT calculates the probability of the observed gene presence-absence  
482 data conditional upon all possible orthology relationships and a tree. It carries this uncertainty in  
483 orthology through its likelihood computations using a hidden Markov model that resembles the  
484 Lander-Green approach for constructing linkage maps on a pedigree (Lander and Green 1987).  
485 The parameter  $\theta_i$  corresponds to the probability that the inferred orthology relationships change  
486 between syntenic neighbors at pillars  $i-1$  and  $i$ . When a pair of pillars are separated by a synteny  
487 break, their orthology relationships are independent (i.e.,  $\theta_i=1/2$ ). Otherwise,  $\theta_i= \theta$ , a global  
488 parameter estimated from the data by maximum likelihood.

489 This modeling framework allows for testing hypotheses about post-polyploidy gene  
490 losses. For tetraploidies, we analyzed three phenomena: duplicate fixation, biased fractionation  
491 and overly frequent parallel losses of the same homoeolog on independent branches of the  
492 phylogeny (Supplemental Table 1). For the triplication events, we focused on differences in  
493 homoeolog loss rates between the three subgenomes (Supplemental Table 2). We further allowed  
494 the root branch to have separate values of the model parameters to account for the two-step

495 nature of hexaploidy formation (Figure 2; Tang, et al. 2012). For the Paramecium and vertebrate  
496 2R octoploidies, we used a null model (WGQ<sub>n</sub>; Figure 2) where losses occur equally from all  
497 four subgenomes, but where the loss rate from triplicated and duplicated loci can differ from that  
498 seen in quadruplicated loci. We also added an octoploid formation step to this model, with all  
499 pillars starting in state D<sub>1,3</sub> and then either experiencing a loss followed by the second tetraploidy  
500 (transitioning to D<sub>1,2</sub> or D<sub>3,4</sub>) or becoming quadruplicated (Q).

501

502 *Analyzing nested genome duplications with POInT.*

503 The vertebrates and ciliates experienced two sequential genome duplications relative to  
504 the outgroup genome to which they were compared. They hence present a challenge because the  
505 POInT computation for such an octoploidy with  $n$  genomes scales as  $O(24^{2n})$ . As a result, it is  
506 only computationally feasible to analyze two such octoploid genomes. However, if the  
507 consecutive whole-genome doublings were sufficiently separated in time, POInT can separate  
508 them using the two-step model just described. This model assumes each locus starts as a  
509 *duplicated* one and then may either remain duplicated until the second polyploidy (and hence  
510 become quadruplicated) or experience a gene loss prior to that event, meaning that the second  
511 event only produces a *duplicate* gene pair (Figure 2). We thus sought to phase regions from both  
512 octoploidies into pairs of regions created by the most recent genome doubling. For the ciliate  
513 genomes, we were able to phase the quadruplicated loci into 11,683 pairs of duplicated loci with  
514 at least one gene from each genome and where our orthology assignment confidence for  
515 assigning extant genes to one of the two subgenomes from the *first* polyploidy event was  $\geq 99\%$ .  
516 For the vertebrate 2R events, a model that attempts to phase the 2R duplicates fit the data no  
517 better than did the null model ( $P=0.1$ , likelihood ratio test with 1 *d.f.*) and so no further phasing  
518 was attempted.

519

520 *POInT and topological inference.*

521 For the legume WGD, the grass  $\rho$  event, the Paramecium tetraploidy, the nematode  
522 triploidy and the salmonid WGD, we used POInT to infer the maximum likelihood phylogeny  
523 under the WGD<sub>bfc-nb</sub> or WGT<sub>G3</sub> models and an exhaustive tree search (Supplemental Figure 4).  
524 For the Brassica WGT, we assumed that *B. rapa* and *B. oleracea* were sister taxa and tested all

525 three rooted topologies consistent with this constraint. The topology for the yeast WGD was  
526 taken from Kurtzman and Robnett (2003), for the TGD from Near et al., (2012) and for At- $\alpha$   
527 from Huang et al., (2016). The vertebrate 2R topology is trivial.

528 For the salmonid WGD, the inferred topology differs significantly from others that have  
529 been published. We therefore fit the full POInT model under the topology published by Crespi  
530 and Fulton (2004). The orthology estimates and model parameters are largely unaffected by this  
531 topology change: the orthology relationships of only 106 (0.7%) pillars with posterior probability  
532 >80% differ when the topology is changed, and 91 of these changes simply swap the identities of  
533 the more and less fractionated genomes. The corresponding figures for 95% confidence are 9 and  
534 7 pillars.

535

536 *Orthology inferences and inference of synonymous distances.*

537 Using high confidence orthologs estimated with POInT, we computed the mean  
538 synonymous divergence for every branch for each polyploidy. The nematode triploidy and  
539 vertebrate 2R events were omitted from this analysis due to their fragmented synteny blocks. For  
540 the tetraploidies, we considered “nearly fully duplicated” pillars: i.e., pillars with at most one  
541 missing gene copy from each of the two gene trees produced by the genome duplication (two  
542 total losses) for all events except the TGD and yeast WGDs, where we allowed two losses from  
543 each subtree (four total losses). For the Brassica hexaploidy, we analyzed only fully triplicated  
544 pillars. At each such pillar, we aligned amino acid sequences for the genes in question with T-  
545 coffee (Notredame, et al. 2000). We fit the Goldman and Yang codon model of evolution  
546 (Goldman and Yang 1994) to the corresponding codon-preserving alignments and mirrored gene  
547 trees and extracted the estimated synonymous divergence ( $K_s$ ) for each branch from this codon  
548 model as described by these authors.

549 With the possible exception of the salmonids (Allendorf and Thorgaard 1984; Braasch  
550 and Postlethwait 2012), all of the events studied are believed to be allopolyploids. For a given  
551 pillar in set of allopolyploid taxa, the mean synonymous divergence observed along this root  
552 branch ( $\overline{K_s^R}$ ; Figure 2D) should represent the sum of the pre-polyploidy divergence of the diploid  
553 progenitors as well as the divergence that occurred after the polyploidy but before the first  
554 speciation event among the polyploid taxa. However, recombination events could, through  
555 genetic drift, result in the replacement of alleles from one of the progenitors with those from the

556 other (Wolfe 2001). These recombinations, or homoeologous exchanges (HE; Gaeta and Chris  
557 Pires 2010) are reasonably common in neopolyploid plants (Doyle, et al. 2008; Chalhoub, et al.  
558 2014; Zhang, et al. 2020), but it is not clear whether they are frequent enough to effect the  
559 divergence seen along these root branches. We extracted the coding sequences for each pillar  
560 that had every homoeologous gene preserved. Post-polyploidy homoeolog displacement (Gaut  
561 and Doebley 1997; Wolfe 2001) will erase the divergence between the progenitor genomes,  
562 leaving only the post-displacement divergence to be observed. In such a case, we might expect to  
563 observe two modes in synonymous divergence, a larger value for homoeologs that did not  
564 experience displacement and a smaller one (lacking the progenitor divergence) for homoeologs  
565 that did. To test this hypothesis, we fit the set of estimated synonymous divergences ( $K_s$ ) along  
566 the root branches to either one or two log-normal distributions using the R package *mclust*  
567 (Scrucca, et al. 2016) with the best-fit model (i.e., one or two distributions) chosen with the  
568 Bayesian information criterion (BIC; Schwarz 1978). Values of  $K_s$  less than  $5 \times 10^{-3}$  or greater  
569 than 2.0 were omitted from these analyses as representing either no synonymous divergence or  
570 saturated synonymous divergence, respectively. When two distributions were fit, a “weighting”  $p$   
571 reflecting the mixing proportion of each component was also estimated. For a few root branches,  
572 a bimodal distribution is preferred. However, in most cases this bimodality is not consistent  
573 across different collections of pillars and, even when it is, the proportion of pillars belonging to  
574 one of the “modes” is generally very small (Supplemental Table 7). We hence see little  
575 suggestion of HE in these data.

576  
577 *Filtering for extreme instances of gene conversion.*

578 Because gene conversion among homoeologs (as seen in yeasts; Evangelisti and Conant  
579 2010; Scienski, et al. 2015) could confound our  $K_s$  estimates, we sought to filter out pillars that  
580 showed strong evidence of having experienced it. We created “gene conversion gene trees” for  
581 each pillar where each homoeologous gene was forced to be sister to its paralog(s). Any pillars  
582 where the likelihood of the sequence alignment under these gene conversion trees was higher  
583 than that seen in the mirrored species trees was omitted from our estimates of synonymous  
584 divergence (Supplemental Figure 5).

585

586 *Comparing duplicate loss rates to estimated synonymous divergence.*

587 Using the  $K_s$  inferences made above for each branch, we compared POInT's maximum  
588 likelihood estimate (MLE) of the rate of homoeolog loss (e.g., its estimated branch length,  $\alpha t$  in  
589 Supplemental Figure 4) to each branch's mean synonymous divergence,  $\overline{K_s}$ , to see if the number  
590 of losses on any particular branch was unusually large or small. Estimating confidence intervals  
591 for these ratios of  $\alpha \cdot t / \overline{K_s}$  is challenging. We treated the numerators and denominators of these  
592 ratios as being normally distributed and independent random variables. The maximum likelihood  
593 estimates (MLEs) of  $\alpha t$  in the numerators should have asymptotically normal distributions with  
594 means that are equal to the true parameter values. The variances of these normal distributions  
595 were approximated by evaluating the inverse of the observed Fisher information (i.e., the  
596 Hessian of the negative log-likelihood; see Kendall and Stuart 1973). We estimated the observed  
597 Fisher information values via a single-dimension finite difference approximation that ignored  
598 covariances between the  $\alpha t$  parameter and other parameters.

599 For each branch of the phylogeny, the  $K_s$  estimates that are in the denominator of the  
600 ratio  $\alpha \cdot t / \overline{K_s}$  are obtained via a sample mean of the  $K_s$  estimates from the sequences of  
601 individual pillars (i.e.,  $\overline{K_s}$ ). Due to the Central Limit Theorem, this sample mean should be  
602 approximately normally distributed with mean equal to the true parameter value and with  
603 variance being approximately the sample variance among individual  $K_s$  estimates divided by the  
604 number of individual  $K_s$  estimates.

605 To infer confidence intervals for the ratio of  $\alpha \cdot t / \overline{K_s}$  on each branch, we independently  
606 sampled from the aforementioned normal distributions that are used to approximate the  
607 uncertainty of  $\alpha t$  and  $\overline{K_s}$  estimates in the ratio. For each branch, we calculated the ratio of these  
608 sampled values for 1000 pairs of randomly sampled values. We then sorted the resulting ratios  
609 and set 95% confidence intervals by finding the ratio value that defined the lower and upper  
610 2.5% of the sorted values.

611 Because the inclusion of fixation in our loss models can give rise to long tip branches  
612 (effectively the model suggests that all surviving duplicates in some genomes are now fixed), we  
613 present data using a model with convergent losses and biased fractionation but no fixation  
614 ( $WGD_{bc-nb}$ ). However, our results are very similar with using the full  $WGD_{bfc-nb}$  model  
615 (Supplemental Figure 6).

616  
617 *Comparisons of selective constraint for different classes of polyploid loci*

618 We examined the inferred average selective constraint ( $K_a/K_s$ , estimated as described  
619 above) for five classes of polyploid loci (e.g., pillars) across the seven WGD events: 1) Pillars  
620 that are single copy in all taxa and have a high probability of having returned to single-copy  
621 along the root branch, 2) Pillars that are completely single copy but where the genes did not  
622 return to single-copy on the root branch (e.g., where alternative copies of the duplicated genes  
623 are preserved in different genomes), 3) pillars with duplicates surviving in only a single species,  
624 4) pillars where all but one species maintains the duplication and 5) pillars where all species  
625 maintain duplicate copies. Confidence intervals for these mean  $K_a/K_s$  estimates were estimated  
626 with the approach of described above.

627

628 *Identifying reciprocal gene losses (RGLs) between polyploid taxa.*

629 For a pair of single-copy genes from distinct genomes, the probability that these genes  
630 represent RGLs is simply the sum of the probabilities of the orthology relationships, estimated  
631 with POInT, that place them as paralogs rather than orthologs. We computed, for each pair of  
632 extant taxa in each polyploidy, the set of RGLs that we could identify with a confidence of  $\geq 95\%$   
633 (Figure 4A). To avoid spurious inferences, we restricted our identification of RGL pairs to  
634 single-copy genes in each genome where either: a) both the gene and the “hole” corresponding to  
635 its lost homoeolog were in synteny with genes on either side or b) the single-copy gene in  
636 question was the only homolog of the outgroup gene used for the inference of the NCS blocks. In  
637 the first case, this filter corresponds to a clear absence of a corresponding homoeolog in the  
638 paralogous synteny block, in the second to the absence of a gene that could be the “missing”  
639 homoeolog. We then used TBLASTX (Altschul, et al. 1997) to search the non-coding regions of  
640 each genome for putative homoeologous copies of the inferred RGL gene that were missed in the  
641 genome annotations (e.g., the inference of RGL was spurious due to an annotation artifact). In  
642 Case “a” above, this search was restricted to the non-coding regions in the “hole” between the  
643 neighboring syntenic genes; in Case “b,” we searched the entire genome for the potentially  
644 unannotated homoeolog. Only RGL genes with no such matching noncoding regions at an E-  
645 value cutoff of  $\leq 10^{-10}$  were considered “true” RGLs. These secondary filters were not applied for  
646 the yeast WGD because those data were taken from the manually curated Yeast Genome Order  
647 Browser (YGOB, Byrne and Wolfe 2005).

648 Data on gene knockouts producing lethal phenotypes from zebrafish, *A. thaliana* and  
649 bakers' yeast were taken from ZFIN (Howe, et al. 2013; Conant 2020); a set of 510 “embryo-  
650 defective” genes identified by Meinke (2020); and Steinmetz et al., (2002), respectively. The  
651 proportion of RGLs in these “essential gene” lists was compared to the proportion of all other  
652 single-copy genes from the same organism in the list using Fisher's exact test (Sokal and Rohlf  
653 1995). For these same three species, we used GeneOntology data (Gene Ontology Consortium  
654 2015) and Panther Overrepresentation Tests (Release 20200728; Mi, et al. 2019) to ask if there  
655 were terms from the GO-Slim Biological Process, Cellular Compartment or Molecular Function  
656 ontologies that differed in their frequency between the RGL genes and other single-copy genes.  
657 After FDR correction (Benjamini and Hochberg 1995), no such terms were found for any of the  
658 three ontologies across any of the three genomes (FDR-corrected  $P$ -value  $> 0.05$ ).

659  
660  
661  
662

663 **Data availability:**

664 All underlying data are available from the POInT browser ([wgd.statgen.ncsu.edu](http://wgd.statgen.ncsu.edu)) and from  
665 figshare (DOI: <https://doi.org/10.6084/m9.figshare.12750992.v4>); the POInT package is  
666 available from GitHub (<https://github.com/gconant0/POInT>)

667

668 **Acknowledgements:**

669 We would like to thank K. Wolfe for helpful comments and K. Byrne for help with the  
670 YGOB datasets. YH, JCP and GCC were supported by National Science Foundation grant NSF-  
671 IOS-1339156. EL was supported by NSF-IOS-1339156 and NSF-IOS-1849708. JLT was  
672 supported by NSF-DEB-1754142 and by National Institutes of Health grant NIH-R01-  
673 GM118508.

674

675 **Competing interests:** The authors declare that they have no competing interests.

676 **References:**

677

- 678 Alix K, Gérard PR, Schwarzacher T, Heslop-Harrison J. 2017. Polyploidy and interspecific  
679 hybridization: partners for adaptation, speciation and evolution in plants. *Annals of botany*  
680 120:183-194.
- 681 Allendorf FW, Bassham S, Cresko WA, Limborg MT, Seeb LW, Seeb JE. 2015. Effects of crossovers  
682 between homeologs on inheritance and population genomics in polyploid-derived salmonid fishes.  
683 *Journal of Heredity* 106:217-227.
- 684 Allendorf FW, Thorgaard GH. 1984. Tetraploidy and the evolution of salmonid fishes. In. *Evolutionary*  
685 *genetics of fishes*: Springer. p. 1-53.
- 686 Altschul SF, Madden TL, Schaffer AA, Zhang JH, Zhang Z, Miller W, Lipman DJ. 1997. Gapped Blast  
687 and Psi-Blast : A new-generation of protein database search programs. *Nucleic acids research*  
688 25:3389-3402.
- 689 Barker MS, Arrigo N, Baniaga AE, Li Z, Levin DA. 2016. On the relative abundance of autopolyploids  
690 and allopolyploids. *New Phytol* 210:391-398.
- 691 Benjamini Y, Hochberg Y. 1995. Controlling the false discovery rate: A practical and powerful approach  
692 to multiple testing. *Journal of the Royal Statistical Society, Series B (Methodological)* 57:289-300.
- 693 Birchler JA, Riddle NC, Auger DL, Veitia RA. 2005. Dosage balance in gene regulation: biological  
694 implications. *Trends Genet* 21:219-226.
- 695 Birchler JA, Veitia RA. 2012. Gene balance hypothesis: connecting issues of dosage sensitivity across  
696 biological disciplines. *Proc Natl Acad Sci U S A* 109:14746-14753.
- 697 Birchler JA, Yao H, Chudalayandi S. 2006. Unraveling the genetic basis of hybrid vigor. *Proceedings of*  
698 *the National Academy of Sciences* 103:12957-12958.
- 699 Blanc-Mathieu R, Perfus-Barbeoch L, Aury J-M, Da Rocha M, Gouzy J, Sallet E, Martin-Jimenez C,  
700 Bailly-Bechet M, Castagnone-Sereno P, Flot J-F. 2017. Hybridization and polyploidy enable  
701 genomic plasticity without sex in the most devastating plant-parasitic nematodes. *PLoS Genetics*  
702 13:e1006777.
- 703 Braasch I, Postlethwait JH. 2012. Polyploidy in fish and the teleost genome duplication. In. *Polyploidy*  
704 *and genome evolution*: Springer. p. 341-383.
- 705 Buggs RJ, Soltis PS, Soltis DE. 2009. Does hybridization between divergent progenitors drive whole-  
706 genome duplication? *Molecular Ecology* 18:3334-3339.
- 707 Byrne KP, Wolfe KH. 2005. The Yeast Gene Order Browser: Combining curated homology and syntenic  
708 context reveals gene fate in polyploid species. *Genome research* 15:1456-1461.
- 709 Chalhoub B, Denoeud F, Liu S, Parkin IA, Tang H, Wang X, Chiquet J, Belcram H, Tong C, Samans B.  
710 2014. Early allopolyploid evolution in the post-Neolithic *Brassica napus* oilseed genome. *Science*  
711 345:950-953.
- 712 Chen ZJ. 2010. Molecular mechanisms of polyploidy and hybrid vigor. *Trends in plant science* 15:57-71.
- 713 Clausen R, Goodspeed T. 1925. Interspecific hybridization in *Nicotiana*. II. A tetraploid *glutinosa-*  
714 *tabacum* hybrid, an experimental verification of Winge's hypothesis. *Genetics* 10:278.
- 715 Conant GC. 2020. The lasting after-effects of an ancient polyploidy on the genomes of teleosts. *PloS*  
716 *ONE* 15:e0231356.



- 717 Conant GC, Birchler JA, Pires JC. 2014. Dosage, duplication, and diploidization: clarifying the interplay  
718 of multiple models for duplicate gene evolution over time. *Current Opinion in Plant Biology* 19:91-  
719 98.
- 720 Conant GC, Wagner A. 2002. GenomeHistory: A software tool and its application to fully sequenced  
721 genomes. *Nucleic acids research* 30:3378-3386.
- 722 Conant GC, Wolfe KH. 2008. Probabilistic cross-species inference of orthologous genomic regions  
723 created by whole-genome duplication in yeast. *Genetics* 179:1681-1692.
- 724 Crespi BJ, Fulton MJ. 2004. Molecular systematics of Salmonidae: combined nuclear data yields a  
725 robust phylogeny. *Molecular phylogenetics and evolution* 31:658-679.
- 726 De Smet R, Adams KL, Vandepoele K, Van Montagu MC, Maere S, Van de Peer Y. 2013. Convergent  
727 gene loss following gene and genome duplications creates single-copy families in flowering plants.  
728 *Proceedings of the National Academy of Sciences, U.S.A.* 110:2898-2903.
- 729 Doyle JJ, Flagel LE, Paterson AH, Rapp RA, Soltis DE, Soltis PS, Wendel JF. 2008. Evolutionary  
730 genetics of genome merger and doubling in plants. *Annual review of genetics* 42:443-461.
- 731 Edger PP, Pires JC. 2009. Gene and genome duplications: the impact of dosage-sensitivity on the fate of  
732 nuclear genes. *Chromosome Research* 17:699-717.
- 733 Emery M, Willis MMS, Hao Y, Barry K, Oakgrove K, Peng Y, Schmutz J, Lyons E, Pires JC, Edger PP,  
734 et al. 2018. Preferential retention of genes from one parental genome after polyploidy illustrates the  
735 nature and scope of the genomic conflicts induced by hybridization. *PLoS Genetics*  
736 14:e1007267em.
- 737 Evangelisti AM, Conant GC. 2010. Nonrandom survival of gene conversions among yeast ribosomal  
738 proteins duplicated through genome doubling. *Genome biology and evolution* 2:826-834.
- 739 Fawcett JA, Maere S, Van de Peer Y. 2009. Plants with double genomes might have had a better chance  
740 to survive the Cretaceous-Tertiary extinction event. *Proc Natl Acad Sci U S A* 106:5737-5742.
- 741 Felsenstein J. 1985. Phylogenies and the comparative method. *American Naturalist*:1-15.
- 742 Gaeta RT, Chris Pires J. 2010. Homoeologous recombination in allopolyploids: the polyploid ratchet.  
743 *New Phytologist* 186:18-28.
- 744 Gaut BS, Doebley JF. 1997. DNA sequence evidence for the segmental allotetraploid origin of maize.  
745 *Proceedings of the National Academy of Sciences* 94:6809-6814.
- 746 Gene Ontology Consortium. 2015. Gene ontology consortium: going forward. *Nucleic acids research*  
747 43:D1049-D1056.
- 748 Goldman N, Yang Z. 1994. A codon-based model of nucleotide substitution for protein-coding DNA  
749 sequences. *Molecular biology and evolution* 11:725-736.
- 750 Howe DG, Bradford YM, Conlin T, Eagle AE, Fashena D, Frazer K, Knight J, Mani P, Martin R, Moxon  
751 SA, et al. 2013. ZFIN, the Zebrafish Model Organism Database: increased support for mutants and  
752 transgenics. *Nucleic acids research* 41:D854-860.
- 753 Huang C-H, Sun R, Hu Y, Zeng L, Zhang N, Cai L, Zhang Q, Koch MA, Al-Shehbaz I, Edger PP. 2016.  
754 Resolution of Brassicaceae phylogeny using nuclear genes uncovers nested radiations and supports  
755 convergent morphological evolution. *Molecular biology and evolution* 33:394-412.
- 756 Kendall M, Stuart A. 1973. *The advanced theory of statistics*. London: Charles Griffen.

- 757 Kirkpatrick S, Gelatt CDJ, Vecchi MP. 1983. Optimization by simulated annealing. *Science* 220:671-  
758 680.
- 759 Kurtzman CP, Robnett CJ. 2003. Phylogenetic relationships among yeasts of the '*Saccharomyces*  
760 complex' determined from multigene sequence analyses. *FEMS Yeast Research* 3:417-432.
- 761 Kuwada Y. 1911. Meiosis in the Pollen Mother Cells of *Zea Mays* L.(With Plate V.). *植物学雑誌*  
762 25:163-181.
- 763 Lander ES, Green P. 1987. Construction of multilocus genetic linkage maps in humans. *Proceedings of*  
764 *the National Academy of Sciences, U.S.A.* 84:2363-2367.
- 765 Li W-H. 1980. Rate of gene silencing at duplicate loci: A theoretical study and interpretation of data  
766 from tetraploid fish. *Genetics* 95:237-258.
- 767 Lynch M, Conery JS. 2000. The evolutionary fate and consequences of duplicate genes. *Science*  
768 290:1151-1155.
- 769 Maclean CJ, Greig D. 2011. Reciprocal gene loss following experimental whole-genome duplication  
770 causes reproductive isolation in yeast. *Evolution: International Journal of Organic Evolution*  
771 65:932-945.
- 772 Mayrose I, Zhan SH, Rothfels CJ, Magnuson-Ford K, Barker MS, Rieseberg LH, Otto SP. 2011.  
773 Recently formed polyploid plants diversify at lower rates. *Science* 333:1257.
- 774 Meinke DW. 2020. Genome-wide identification of EMBRYO-DEFECTIVE (EMB) genes required for  
775 growth and development in *Arabidopsis*. *New Phytologist* 226:306-325.
- 776 Mi H, Muruganujan A, Ebert D, Huang X, Thomas PD. 2019. PANTHER version 14: more genomes, a  
777 new PANTHER GO-slim and improvements in enrichment analysis tools. *Nucleic Acids Res*  
778 47:D419-D426.
- 779 Mizuta Y, Harushima Y, Kurata N. 2010. Rice pollen hybrid incompatibility caused by reciprocal gene  
780 loss of duplicated genes. *Proceedings of the National Academy of Sciences* 107:20417-20422.
- 781 Muir CD, Hahn MW. 2015. The limited contribution of reciprocal gene loss to increased speciation rates  
782 following whole-genome duplication. *The American Naturalist* 185:70-86.
- 783 Near TJ, Eytan RI, Dornburg A, Kuhn KL, Moore JA, Davis MP, Wainwright PC, Friedman M, Smith  
784 WL. 2012. Resolution of ray-finned fish phylogeny and timing of diversification. *Proceedings of*  
785 *the National Academy of Sciences, U.S.A.* 109:13698-13703.
- 786 Notredame C, Higgins DG, Heringa J. 2000. T-Coffee: A novel method for fast and accurate multiple  
787 sequence alignment. *Journal of molecular biology* 302:205-217.
- 788 Ohno S. 1970. *Evolution by gene duplication*. New York: Springer.
- 789 Pires JC, Conant GC. 2016. Robust Yet Fragile: Expression Noise, Protein Misfolding and Gene Dosage  
790 in the Evolution of Genomes. *Annual review of genetics* 50:113–131.
- 791 Sankoff D, Blanchette M. 1998. Multiple genome rearrangement and breakpoint phylogeny. *Journal of*  
792 *Computational Biology* 5:555-570.
- 793 Scannell DR, Byrne KP, Gordon JL, Wong S, Wolfe KH. 2006. Multiple rounds of speciation associated  
794 with reciprocal gene loss in polyploid yeasts. *Nature* 440:341-345.

- 795 Scannell DR, Frank AC, Conant GC, Byrne KP, Woolfit M, Wolfe KH. 2007. Independent sorting-out  
796 of thousands of duplicated gene pairs in two yeast species descended from a whole-genome  
797 duplication. *Proceedings of the National Academy of Sciences, U.S.A.* 104:8397-8402.
- 798 Schnable JC, Freeling M, Lyons E. 2012. Genome-wide analysis of syntenic gene deletion in the grasses.  
799 *Genome Biol Evol* 4:265-277.
- 800 Schoonmaker A, Hao Y, Bird D, Conant GC. 2020. A single, shared triploidy in three species of  
801 parasitic nematodes. *G3: Genes, Genomes, Genetics* 10:225-233.
- 802 Schranz ME, Mohammadin S, Edger PP. 2012. Ancient whole genome duplications, novelty and  
803 diversification: the WGD Radiation Lag-Time Model. *Current Opinion in Plant Biology* 15:147-  
804 153.
- 805 Schwarz G. 1978. Estimating the dimension of a model. *Annals of statistics* 6:461-464.
- 806 Scienski K, Fay JC, Conant GC. 2015. Patterns of Gene Conversion in Duplicated Yeast Histones  
807 Suggest Strong Selection on a Coadapted Macromolecular Complex. *Genome biology and  
808 evolution* 7:3249-3258.
- 809 Scrucca L, Fop M, Murphy TB, Raftery AE. 2016. mclust 5: clustering, classification and density  
810 estimation using Gaussian finite mixture models. *The R journal* 8:289.
- 811 Sokal RR, Rohlf FJ. 1995. *Biometry: 3rd Edition*. New York: W. H. Freeman and Company.
- 812 Soltis DE, Albert VA, Leebens-Mack J, Bell CD, Paterson AH, Zheng C, Sankoff D, dePamphilis CW,  
813 Wall PK, Soltis PS. 2009. Polyploidy and angiosperm diversification. *American Journal of Botany*  
814 96:336-348.
- 815 Soltis DE, Segovia-Salcedo MC, Jordon-Thaden I, Majure L, Miles NM, Mavrodiev EV, Mei W, Cortez  
816 MB, Soltis PS, Gitzendanner MA. 2014. Are polyploids really evolutionary dead-ends (again)? A  
817 critical reappraisal of Mayrose et al.(2011). *New Phytologist* 202:1105-1117.
- 818 Soltis DE, Visger CJ, Soltis PS. 2014. The polyploidy revolution then... and now: Stebbins revisited.  
819 *American Journal of Botany* 101:1057-1078.
- 820 Stebbins Jr GL. 1947. Types of polyploids: their classification and significance. In. *Advances in  
821 genetics: Elsevier*. p. 403-429.
- 822 Steinmetz LM, Scharfe C, Deutschbauer AM, Mokranjac D, Herman ZS, Jones T, Chu AM, Giaever G,  
823 Prokisch H, Oefner PJ, et al. 2002. Systematic screen for human disease genes in yeast. *Nature  
824 genetics* 31:400-404.
- 825 Tang H, Woodhouse MR, Cheng F, Schnable JC, Pedersen BS, Conant G, Wang X, Freeling M, Pires  
826 JC. 2012. Altered patterns of fractionation and exon deletions in *Brassica rapa* support a two-step  
827 model of paleohexaploidy. *Genetics* 190:1563-1574.
- 828 Tasdighian S, Van Bel M, Li Z, Van de Peer Y, Carretero-Paulet L, Maere S. 2017. Reciprocally  
829 retained genes in the angiosperm lineage show the hallmarks of dosage balance sensitivity. *The  
830 Plant Cell* 29:2766-2785.
- 831 Thomas BC, Pedersen B, Freeling M. 2006. Following tetraploidy in an *Arabidopsis* ancestor, genes  
832 were removed preferentially from one homeolog leaving clusters enriched in dose-sensitive genes.  
833 *Genome research* 16:934-946.
- 834 Tsai IJ, Bensasson D, Burt A, Koufopanou V. 2008. Population genomics of the wild yeast  
835 *Saccharomyces paradoxus*: Quantifying the life cycle. *Proceedings of the National Academy of  
836 Sciences, U.S.A.* 105:4957-4962.

- 837 Van de Peer Y, Mizrachi E, Marchal K. 2017. The evolutionary significance of polyploidy. *Nature*  
838 *Reviews Genetics* 18:411-424.
- 839 Wagner Jr W. 1970. Biosystematics and evolutionary noise. *Taxon* 19:146-151.
- 840 Werth CR, Windham MD. 1991. A model for divergent, allopatric speciation of polyploid pteridophytes  
841 resulting from silencing of duplicate-gene expression. *The American Naturalist* 137:515-526.
- 842 Wolfe KH. 2001. Yesterday's polyploids and the mystery of diploidization. *Nat Rev Genet* 2:333-341.
- 843 Zhang Z, Gou X, Xun H, Bian Y, Ma X, Li J, Li N, Gong L, Feldman M, Liu B. 2020. Homoeologous  
844 exchanges occur through intragenic recombination generating novel transcripts and proteins in  
845 wheat and other polyploids. *Proceedings of the National Academy of Sciences*.
- 846
